# Supplementary material for: LI-RADS Treatment Response versus Modified RECIST for Diagnosing Viable Hepatocellular Carcinoma after Locoregional Therapy: A Systematic Review and Meta-Analysis of Comparative Studies
Source: PubMed Central journal article supplement — Taehan Yongsang Uihakhoe Chi. 2022 Feb 25;83(2):331–43. doi: 10.3348/jksr.2021.0173 (PMC9514432; doi:10.3348/jksr.2021.0173), 2022-02-25
Supplement: jksr-83-331-s001.pdf [file jksr-83-331-s001.pdf]

## SUPPLEMENTARY MATERIAL

### DATA ITEMS

The following data were extracted from each eligible study: 1) study characteristics, including authors, publication year, and study design, 2) subject characteristics, including the number of patients, age, and dominant etiology of underlying liver disease, 3) number and size of treated observations, 4) the specific type of LRTs performed in each study, 5) imaging modality (CT or MRI), 6) MRI characteristics, including the type of contrast agent used and MRI field strength, 7) number of reviewers and image analysis method, 8) details of the reference standard for determining tumor viability, 9) interobserver agreement ( $\kappa$ ) for the classification of treated observations according to Liver Imaging Reporting and Data System Treatment Response (LR-TR) and modified Response Evaluation Criteria in Solid Tumors (mRECIST), and 10) study outcomes—the number of true positives, false positives, false negatives, and true negatives for diagnosing pathologically viable hepatocellular carcinoma using viable category for each criterion. If not distinctly mentioned, the data were manually retrieved from the tables and figures. If more than one dataset was provided within the study by multiple independent reviewers, the dataset with the highest accuracy was chosen for the meta-analysis. If the data presented in the study were insufficient, we personally requested the corresponding authors to provide additional data.
