# Supplementary material for: LI-RADS Treatment Response versus Modified RECIST for Diagnosing Viable Hepatocellular Carcinoma after Locoregional Therapy: A Systematic Review and Meta-Analysis of Comparative Studies
Source: PubMed Central journal article supplement — Taehan Yongsang Uihakhoe Chi. 2022 Feb 25;83(2):331–43. doi: 10.3348/jksr.2021.0173 (PMC9514432; doi:10.3348/jksr.2021.0173), 2022-02-25
Supplement: jksr-83-331-s002.pdf [file jksr-83-331-s002.pdf]

Supplementary Table 1. Search Queries

| No. | Search Queries for MEDLINE                                                                            |
|-----|-------------------------------------------------------------------------------------------------------|
| #1  | ("Liver Neoplasms" [Mesh] OR "Liver" [Mesh]) AND "Radiology Information Systems" [mesh]               |
| #2  | "LI-RADS" [TW] OR "LR-TR" [TW] OR "liver imaging reporting" [TW] OR "LI-RADS Treatment Response" [TW] |
| #3  | #1 OR #2                                                                                              |
| #4  | Magnetic Resonanc*[TW] OR MRI[TW] OR MR[TW] OR CT[TW] OR Computed Tomography[TW]                      |
| #5  | #3 AND #4                                                                                             |
| #6  | #5 AND English[Lang] AND ("2017/01/01" [PDAT]: "3000/12/31" [PDAT])                                   |
| No. | Search Queries for EMBASE                                                                             |
| #1  | 'liver imaging reporting and data system'/exp                                                         |
| #2  | ('LI-RADS' OR 'LR-TR' OR 'liver imaging reporting' OR 'LI-RADS Treatment Response'):ab,ti,kw          |
| #3  | #1 OR #2                                                                                              |
| #4  | ('Magnetic Resonanc*' OR MRI OR MR OR CT OR 'Computed Tomography'):ab,ti,kw                           |
| #5  | #3 AND #4                                                                                             |
| #6  | #5 AND [english]/lim AND [2017-2021]/py                                                               |
