# Supplementary material for: LI-RADS Treatment Response versus Modified RECIST for Diagnosing Viable Hepatocellular Carcinoma after Locoregional Therapy: A Systematic Review and Meta-Analysis of Comparative Studies
Source: PubMed Central journal article supplement — Taehan Yongsang Uihakhoe Chi. 2022 Feb 25;83(2):331–43. doi: 10.3348/jksr.2021.0173 (PMC9514432; doi:10.3348/jksr.2021.0173), 2022-02-25

**Supplementary Fig. 1.** Results of quality assessments of the articles according to QUADAS-2 criteria. The methodological quality distribution of the articles is presented as the proportion of articles (0%–100%) with a low (i.e., high quality), high, and unclear risk of bias, and the proportions of articles with low (i.e., high quality), high, or unclear concerns regarding applicability for each domain. QUADAS = Quality Assessment of Diagnostic Accuracy Studies

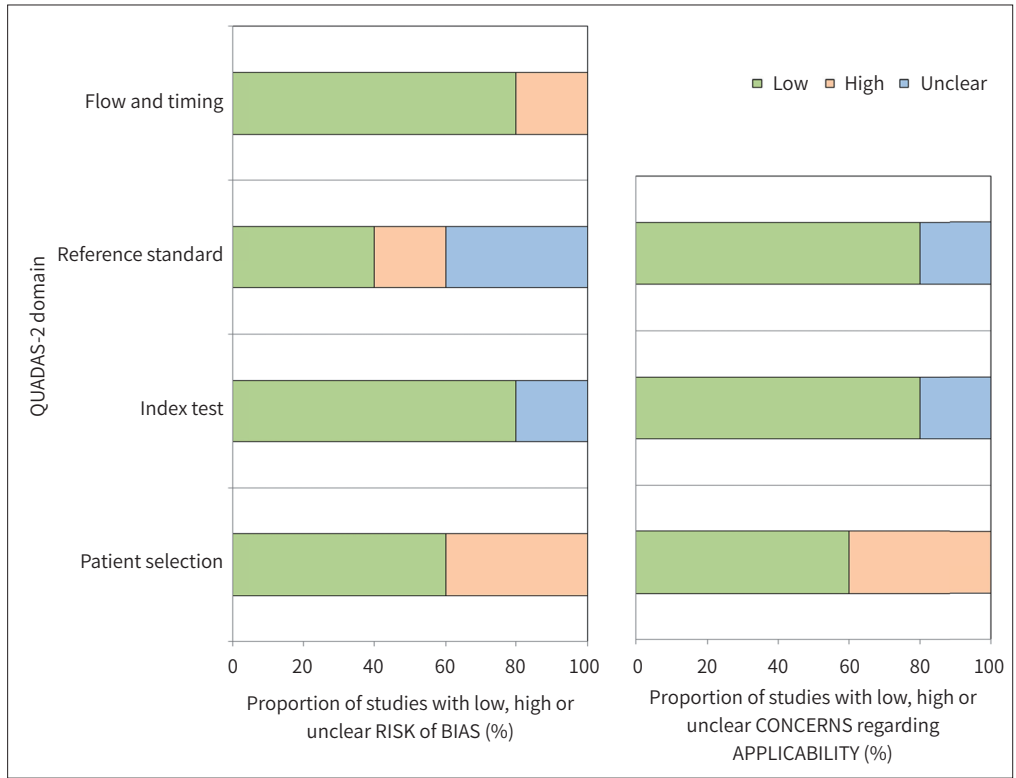

Supplement: jksr-83-331-s003.pdf [file jksr-83-331-s003.pdf]
