# Supplementary material for: LI-RADS Treatment Response versus Modified RECIST for Diagnosing Viable Hepatocellular Carcinoma after Locoregional Therapy: A Systematic Review and Meta-Analysis of Comparative Studies
Source: PubMed Central journal article supplement — Taehan Yongsang Uihakhoe Chi. 2022 Feb 25;83(2):331–43. doi: 10.3348/jksr.2021.0173 (PMC9514432; doi:10.3348/jksr.2021.0173), 2022-02-25

**Supplementary Fig. 2.** HSROC curves for the accuracy of LI-RADS treatment response (A) and mRECIST viable category (B).  
 HSROC = hierarchical summary receiver operating characteristic, LI-RADS = Liver Imaging Reporting and Data Systems, mRECIST = modified Response Evaluation Criteria in Solid Tumors

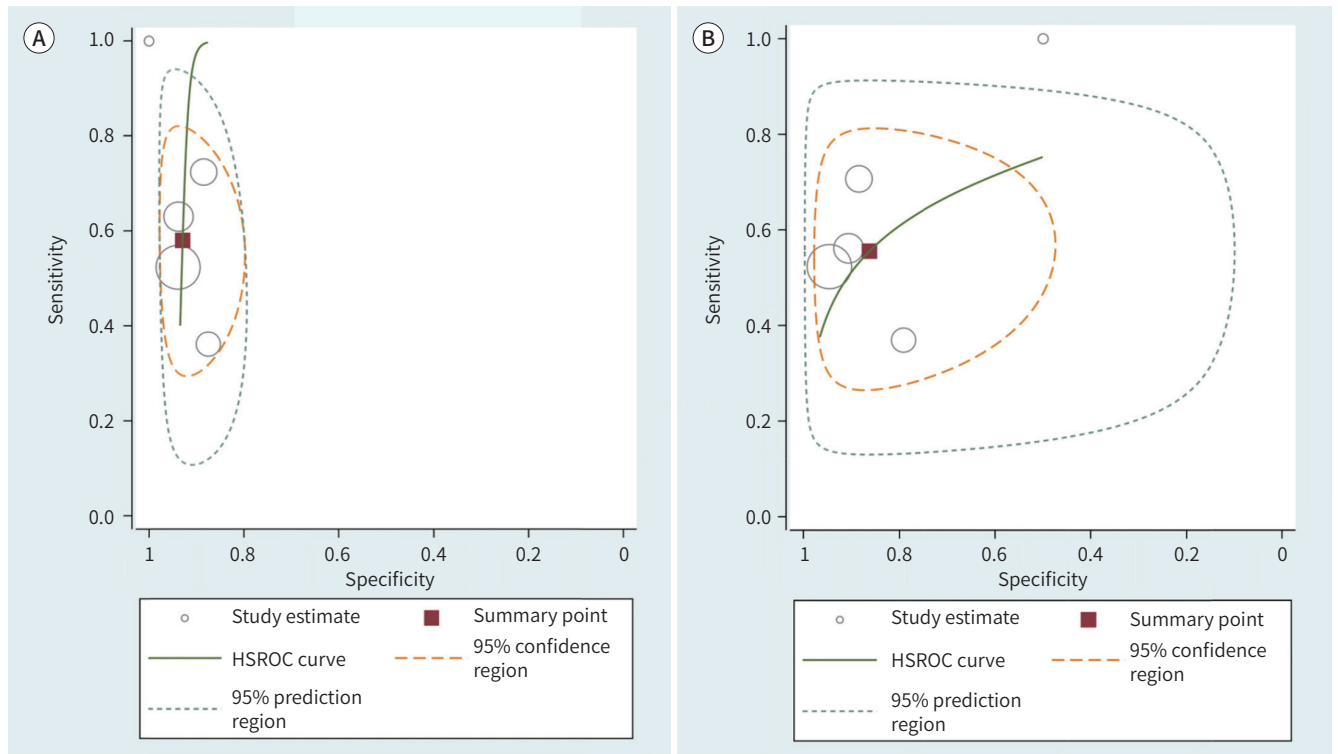

Supplement: jksr-83-331-s004.pdf [file jksr-83-331-s004.pdf]
